# Supplementary material for: Impact of drought and salt stress on galactinol and raffinose family oligosaccharides in common bean (Phaseolus vulgaris)
Source: PubMed Central journal article supplement (PMC10327629; doi:10.1093/aobpla/plad038), 2023-07-05
Supplement: plad038_suppl_supplementary_material.pdf [file plad038_suppl_supplementary_material.pdf]

# Supporting Information

## Impact of drought and salt stress on galactinol and raffinose family oligosaccharides in common bean (*Phaseolus vulgaris* L.)

Ramon de Koning, Gertjan E. Wils , Raphaël Kiekens, Luc De Vuyst, Geert Angenon

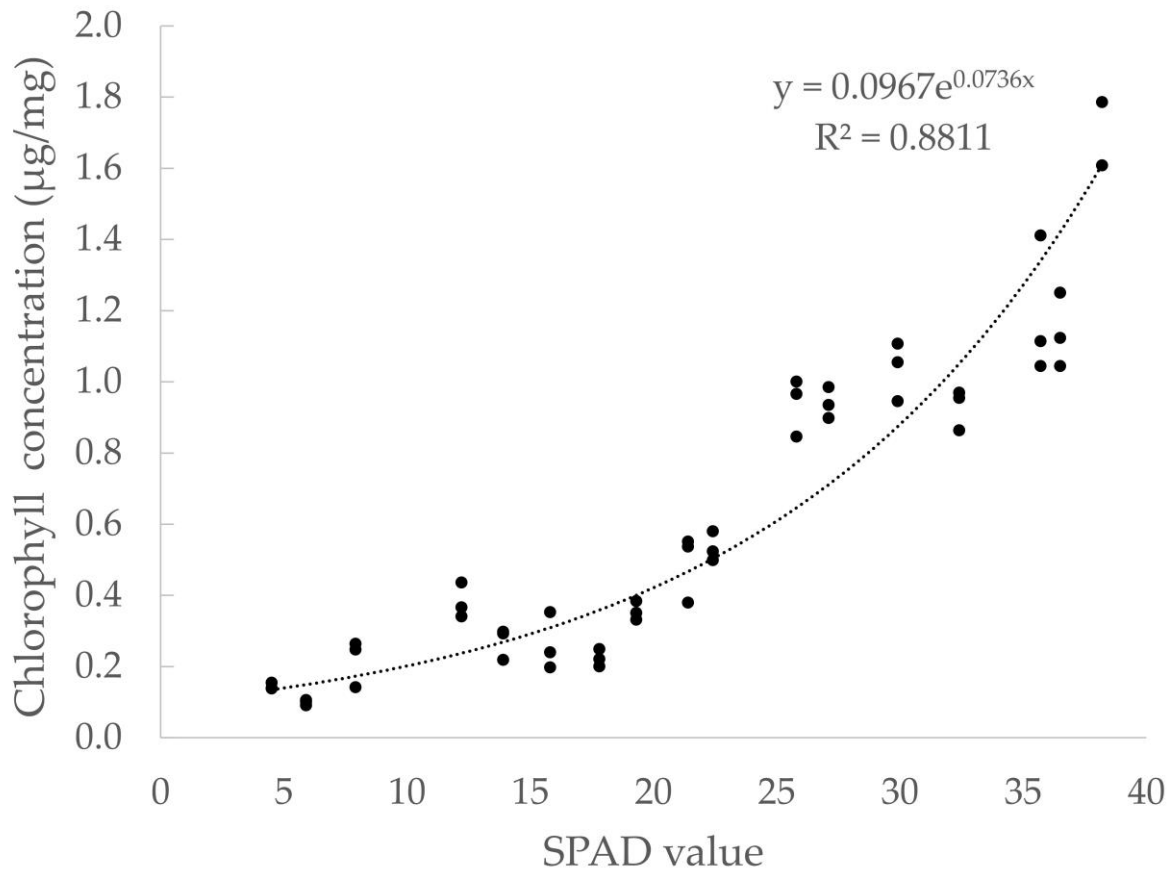

**Figure S1.** Relationship between the chlorophyll content of the leaves of 17 *P. vulgaris* cv. CIAP7247F plants and their corresponding SPAD values (ranging from 4.5 to 38.2). The leaf chlorophyll content of each plant is represented by three technical replicates.

**Table S1.** Primers used for RT-qPCR.\*Accession numbers were adopted from Phytozome v12.1 (*P. vulgaris* v2.1).

| Accession Number*                      | Gene name       | Forward Primer                               | Tm (°C) | Reverse Primer                               | Tm (°C) | Amplicon length (nt) |
|----------------------------------------|-----------------|----------------------------------------------|---------|----------------------------------------------|---------|----------------------|
| Phvul.001G215300                       | <i>PvGolS1</i>  | 5'CGCGTAGGAG<br>ATGACTTTTG <sup>3'</sup>     | 60.5    | 5'GCACATGGG<br>TGAGTAGATTG <sup>3'</sup>     | 60.4    | 103                  |
| Phvul.001G223700                       | <i>PvGolS2</i>  | 5'ACAGTGCCCTA<br>ATAAAGTTCAG <sup>3'</sup>   | 60.4    | 5'G TTCAGAAA<br>GTCCTGCTCAG <sup>3'</sup>    | 60.2    | 168                  |
| Phvul.007G203400                       | <i>PvGolS3</i>  | 5'GAATTTGGGA<br>GTTTGTGGAG <sup>3'</sup>     | 58.9    | 5'AGAAGTAGTTAT<br>CAGGCAAGTC <sup>3'</sup>   | 59.6    | 161                  |
| Phvul.004G007100                       | <i>PvRS1</i>    | 5'GACAATATTT<br>CGGTGTGCGT <sup>3'</sup>     | 61      | 5'TAGAAGGTTGA<br>AGCTTCCCA <sup>3'</sup>     | 60.9    | 155                  |
| Phvul.009G175400                       | <i>PvRS2</i>    | 5'GACCCATTTAC<br>GTTAGTGATTGTG <sup>3'</sup> | 61.8    | 5'CACCTGTATGTT<br>TGTTGAGATTCC <sup>3'</sup> | 61.8    | 131                  |
| Phvul.001G214300                       | <i>PvSS</i>     | 5'CTCATTAAGAAG<br>CTTGTCTTCCC <sup>3'</sup>  | 61.1    | 5'CTCCTCCATACT<br>TATTGAAGTTCC <sup>3'</sup> | 60.5    | 144                  |
| Actin-11 (Borges <i>et al.</i> , 2012) | <i>Actin-11</i> | 5'TGCATACGTT<br>GGTGATGAGG <sup>3'</sup>     | 62.2    | 5'AGCCTTGGGGTT<br>AAGAGGAG <sup>3'</sup>     | 63.2    | 190                  |

**Table S2.** Analysis of the galactinol and raffinose family oligosaccharides content in root and leaf samples of *P. vulgaris* CIAP7247F under different abiotic stress conditions using HPAEC-PAD. The blue colour indicates values above the limits of quantification (LOQ) whereas the red colour indicates values below the limits of detection (LOD).

|                                                | Linearity<br>(mg/l)   | Equation               | R <sup>2</sup>     | LOD<br>(mg/l)         | LOQ (mg/l)            |
|------------------------------------------------|-----------------------|------------------------|--------------------|-----------------------|-----------------------|
| Galactinol                                     | 0.024 - 50            | $y = 0.0329x + 0.0008$ | 0.9971             | 0.84                  | 2.55                  |
| Raffinose                                      | 0.024 - 50            | $y = 0.0332x - 0.0071$ | 0.9997             | 0.24                  | 0.73                  |
| Stachyose                                      | 0.024 - 50            | $y = 0.063x + 0.0099$  | 0.9996             | 0.29                  | 0.89                  |
| <b>Leaf content in HPLC vial (n = 3, mg/l)</b> |                       |                        |                    |                       |                       |
|                                                | Control<br>(DAS = 22) | Drought<br>(DAS = 22)  | Salt<br>(DAS = 22) | Control<br>(DAS = 25) | Drought<br>(DAS = 25) |
| Galactinol                                     | 10.49 ± 0.167         | 11.91 ± 0.41           | 7.76 ± 1.67        | 8.15 ± 0.77           | 14.34 ± 1.36          |
| Raffinose                                      | 4.31 ± 0.59           | 8.84 ± 0.57            | 6.8 ± 0.65         | 5.13 ± 0.54           | 6.16 ± 0.54           |
| Stachyose                                      | -                     | 0.15 ± 0.05            | 0.14 ± 0.14        | -                     | -                     |
| <b>Root content in HPLC vial (n = 3, mg/l)</b> |                       |                        |                    |                       |                       |
|                                                | Control<br>(DAS = 22) | Drought<br>(DAS = 22)  | Salt<br>(DAS = 22) | Control<br>(DAS = 25) | Drought<br>(DAS = 25) |
| Galactinol                                     | 0.27 ± 0.16           | 0.66 ± 0.19            | 0.37 ± 0.09        | 0.53 ± 0.33           | 0.52 ± 0.16           |
| Raffinose                                      | -                     | -                      | 0.09 ± 0.09        | -                     | 0.18 ± 0.18           |
| Stachyose                                      | -                     | -                      | -                  | -                     | -                     |
